# Supplementary material
Source: HighWire-hosted journal article supplement (http://molpharm.aspetjournals.org/highwire/filestream/76726/field_highwire_adjunct_files/0/Fig_Supplementary_1.pdf)
Supplement: Fig_Supplementary_1.pdf [file Fig_Supplementary_1.pdf]

## Supplementary Material

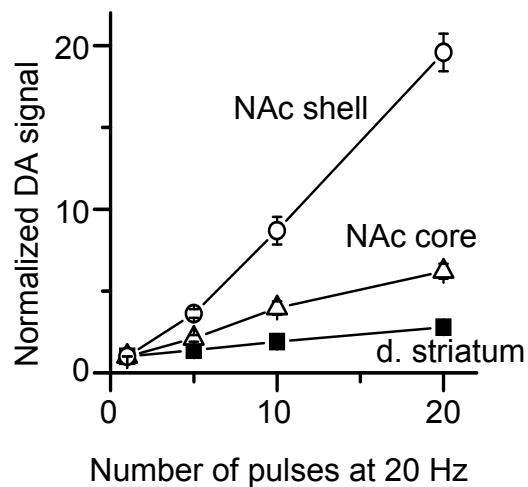

**Supplementary Figure 1.** The dorsolateral striatum, the NAc core, and the NAc shell respond differently to stimulus trains of 5p, 10p, or 20p given at 20 Hz. For each anatomical region, the DA signal is normalized to its response to 1p to compare the shape of the frequency dependence. The response to longer stimulus trains extends the results of Fig. 5a, control. The NAc core shows DA signaling characteristics that are intermediate between the dorsolateral striatum and the NAc shell. In the absence of antagonists (control), the DA signal showed more responsiveness to phasic stimulus trains in the following order: NAc shell > NAc core > dorsolateral striatum.

Supplementary  
Fig. 1  
Zhang et al.
